# Supplementary material
Source: HighWire-hosted journal article supplement (https://erj.ersjournals.com/content/55/6/1902455)
Supplement: inline-supplementary-material-1 [file inline-supplementary-material-1.pdf]

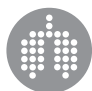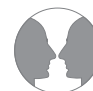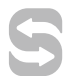

SHAREABLE PDF

# Rape, asthma and dysfunctional breathing

Robert J. Hancox <sup>1</sup>, Jane Morgan<sup>2</sup>, Nigel Dickson<sup>1</sup>, Jennie Connor<sup>1</sup> and Joanne M. Baxter<sup>3</sup>

**Affiliations:** <sup>1</sup>Dept of Preventive and Social Medicine, Dunedin School of Medicine, University of Otago, Dunedin, New Zealand. <sup>2</sup>Dept of Sexual Health, Waikato Hospital, Hamilton, New Zealand. <sup>3</sup>Kōhatu – Centre for Hauora Māori, University of Otago, Dunedin, New Zealand.

**Correspondence:** Robert J. Hancox, University of Otago, Dept of Preventive and Social Medicine, Dunedin School of Medicine, PO Box 913, Dunedin, New Zealand. E-mail: bob.hancox@otago.ac.nz

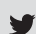

@ERSpublications

**A history of rape is a risk factor for dysfunctional breathing in adults of both sexes and for late-onset asthma diagnosis in women** <http://bit.ly/2TFhdAH>

**Cite this article as:** Hancox RJ, Morgan J, Dickson N, *et al.* Rape, asthma and dysfunctional breathing. *Eur Respir J* 2020; 55: 1902455 [<https://doi.org/10.1183/13993003.02455-2019>].

This single-page version can be shared freely online.

## *To the Editor:*

Functional breathing disorders are common, but poorly understood, causes of respiratory symptoms, and often co-exist with asthma and other respiratory diseases [1–3]. Hyperventilation syndrome is the most recognised form of dysfunctional breathing. It has long been suspected that dysfunctional breathing may have emotional origins, but there is little empirical evidence to support this [4].
